# Supplementary material for: Transposable Elements Are Co-opted as Oncogenic Regulatory Elements by Lineage-Specific Transcription Factors in Prostate Cancer
Source: PubMed Central journal article supplement — Cancer Discov. 2023 Sep 11;13(11):2470–87. doi: 10.1158/2159-8290.CD-23-0331 (PMC10618745; doi:10.1158/2159-8290.cd-23-0331), 2023-09-11
Supplement: cd-23-0331_supplementary_figure_s1_suppsf1.pdf [file cd-23-0331_supplementary_figure_s1_suppsf1.pdf]

# Supplementary Figure S1

**A**

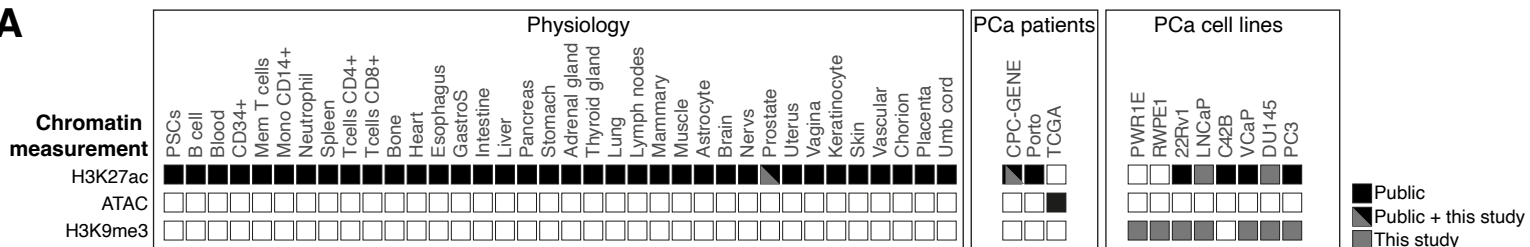

**B**

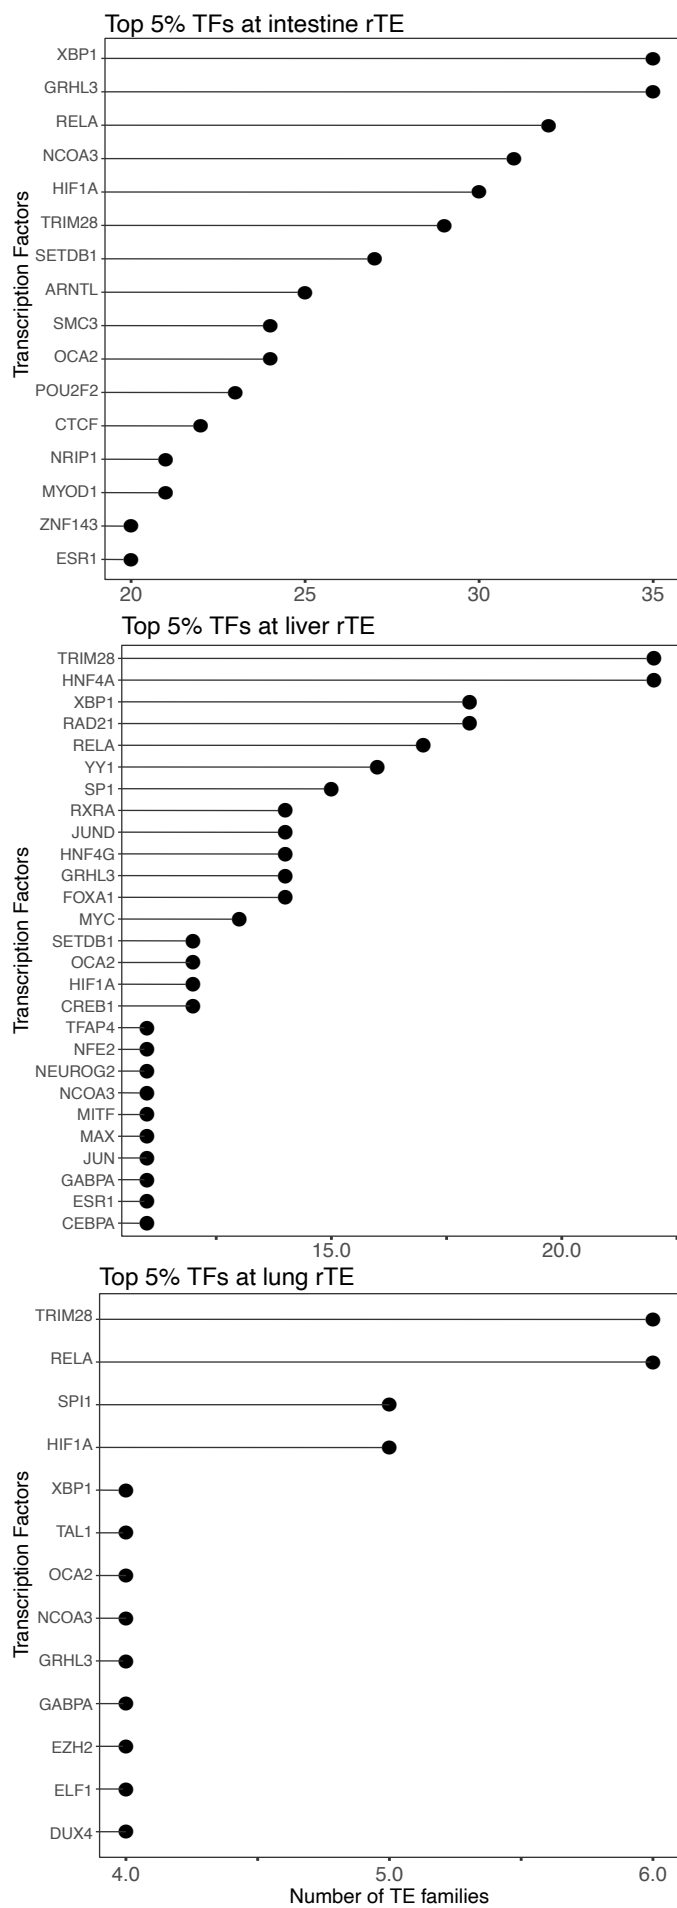

**C**

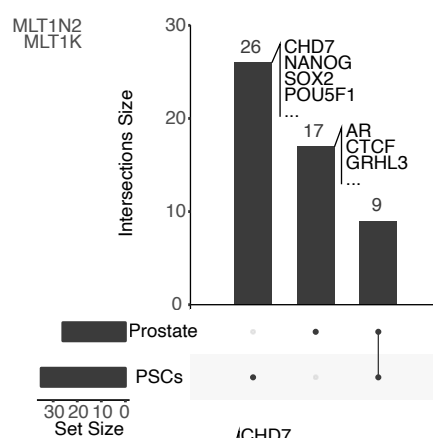

**D**

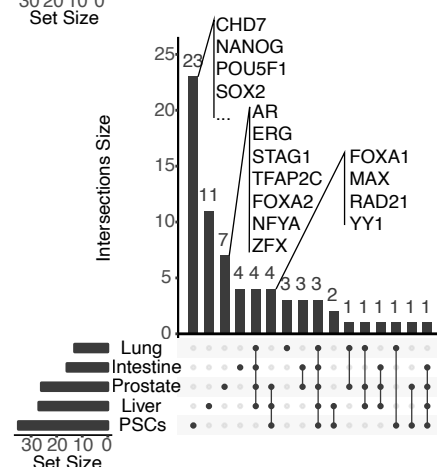

**E**

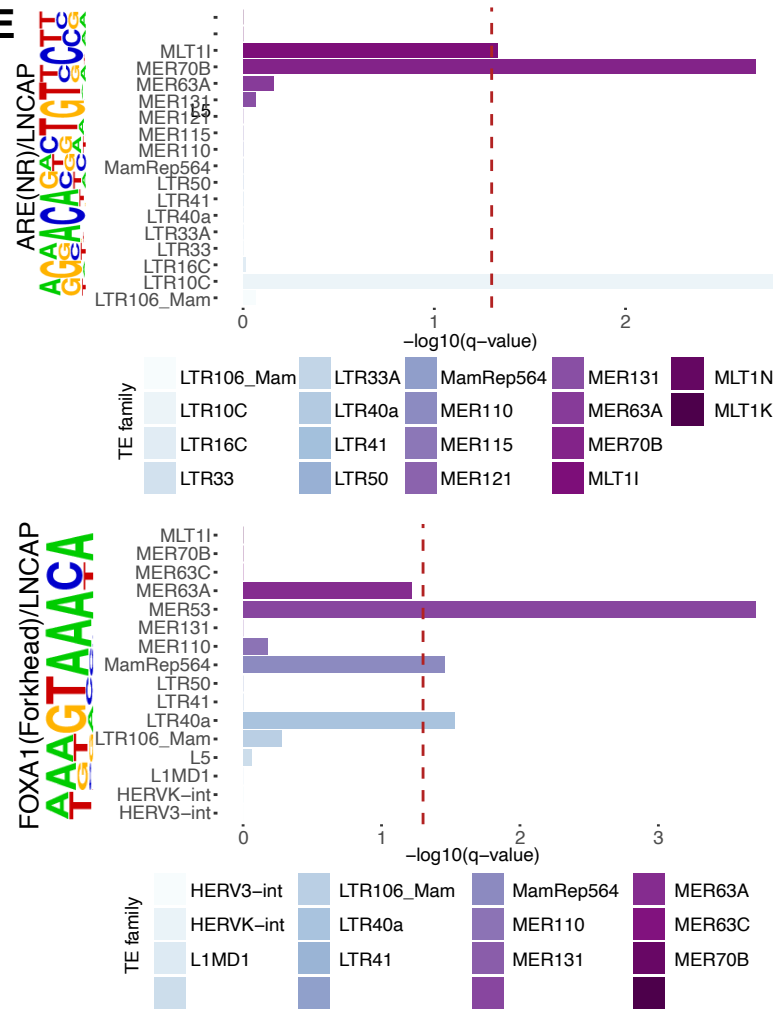

### **Supplementary Figure S1**

- A. Data roadmap for the present study, showcasing the type of data used in this study.
- B. Frequency plot of transcription factor cistromes (TF) enriched at regulatory transposable element families (rTE) enriched in intestine, liver or lung regulatory elements. The top 5% most frequently enriched transcription factor cistromes are shown.
- C. UpSet plot showing the intersection of transcription factor cistromes found in the top 5% most frequent cistromes enriched in benign prostate or pluripotent stem cells (PSCs).
- D. UpSet plot showing the intersection of transcription factor cistromes found in the top 5% most frequent cistromes enriched in benign prostate, lung, intestine, liver or pluripotent stem cells (PSCs).
- E. Enrichment of AR and FOXA1 DNA recognition sequences within transposable element families showing enrichment of AR or FOXA1 cistromes (from Figure 2D). Bars represent  $-\log_{10}(\text{q-value})$  for each transposable element family for transcription factor DNA recognition sequences. The red dashed line corresponds to  $-\log_{10}(\text{q-value})=1.3$  ( $\text{q-value}=0.05$ ) threshold. q-values correspond to Benjamini corrected p-values.
