# Supplementary material for: Transposable Elements Are Co-opted as Oncogenic Regulatory Elements by Lineage-Specific Transcription Factors in Prostate Cancer
Source: PubMed Central journal article supplement — Cancer Discov. 2023 Sep 11;13(11):2470–87. doi: 10.1158/2159-8290.CD-23-0331 (PMC10618745; doi:10.1158/2159-8290.cd-23-0331), 2023-09-11
Supplement: cd-23-0331_supplementary_figure_s4_suppsf4.pdf [file cd-23-0331_supplementary_figure_s4_suppsf4.pdf]

# Supplementary Figure S4

## A AR occupancy over AR enriched TE families (p-value < 0.05)

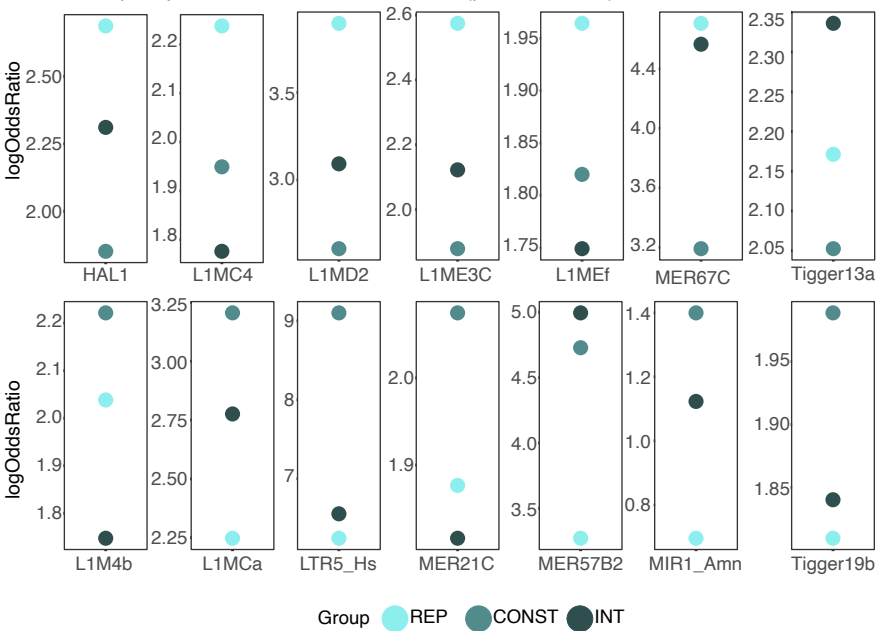

## B

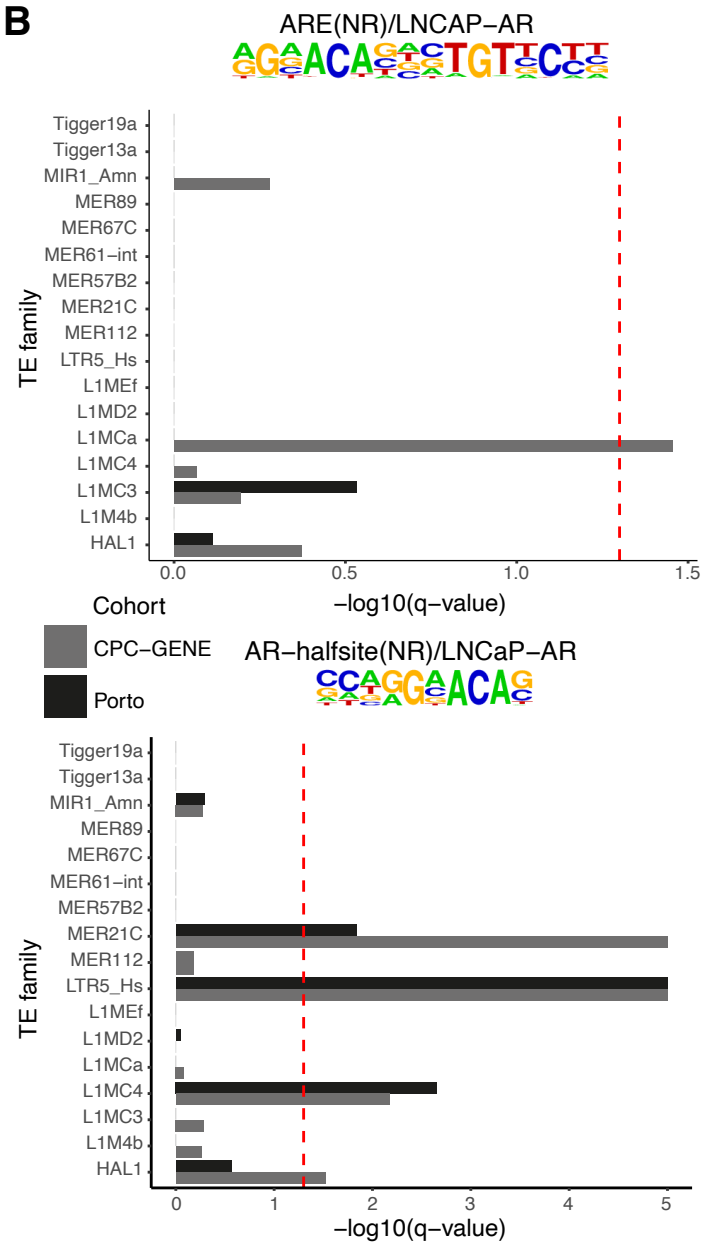

#### **Supplementary Figure S4**

A. Enrichment of AR cistromes profiled in reprogrammed (REP), intermediate (INT), and constant (CONST) Porto patients at transposable element families with enrichment of AR cistrome (shown in Figure 4B,D). Note that for the majority (top two rows) the AR cistrome in reprogrammed patients is higher than constant patients.

B. Enrichment of AR DNA recognition sequences within transposable element families with enrichment of AR cistrome (shown in A). Bars represent  $-\log_{10}(\text{q-value})$  for CPC-GENE or Porto reprogrammed patients. The red dashed line corresponds to  $-\log_{10}(\text{q-value})=1.3$  ( $\text{q-value}=0.05$ ) threshold. q-values correspond to Benjamini corrected p-values.
