# Supplementary material for: Transposable Elements Are Co-opted as Oncogenic Regulatory Elements by Lineage-Specific Transcription Factors in Prostate Cancer
Source: PubMed Central journal article supplement — Cancer Discov. 2023 Sep 11;13(11):2470–87. doi: 10.1158/2159-8290.CD-23-0331 (PMC10618745; doi:10.1158/2159-8290.cd-23-0331), 2023-09-11
Supplement: cd-23-0331_supplementary_figure_s5_suppsf5.pdf [file cd-23-0331_supplementary_figure_s5_suppsf5.pdf]

# Supplementary Figure S5

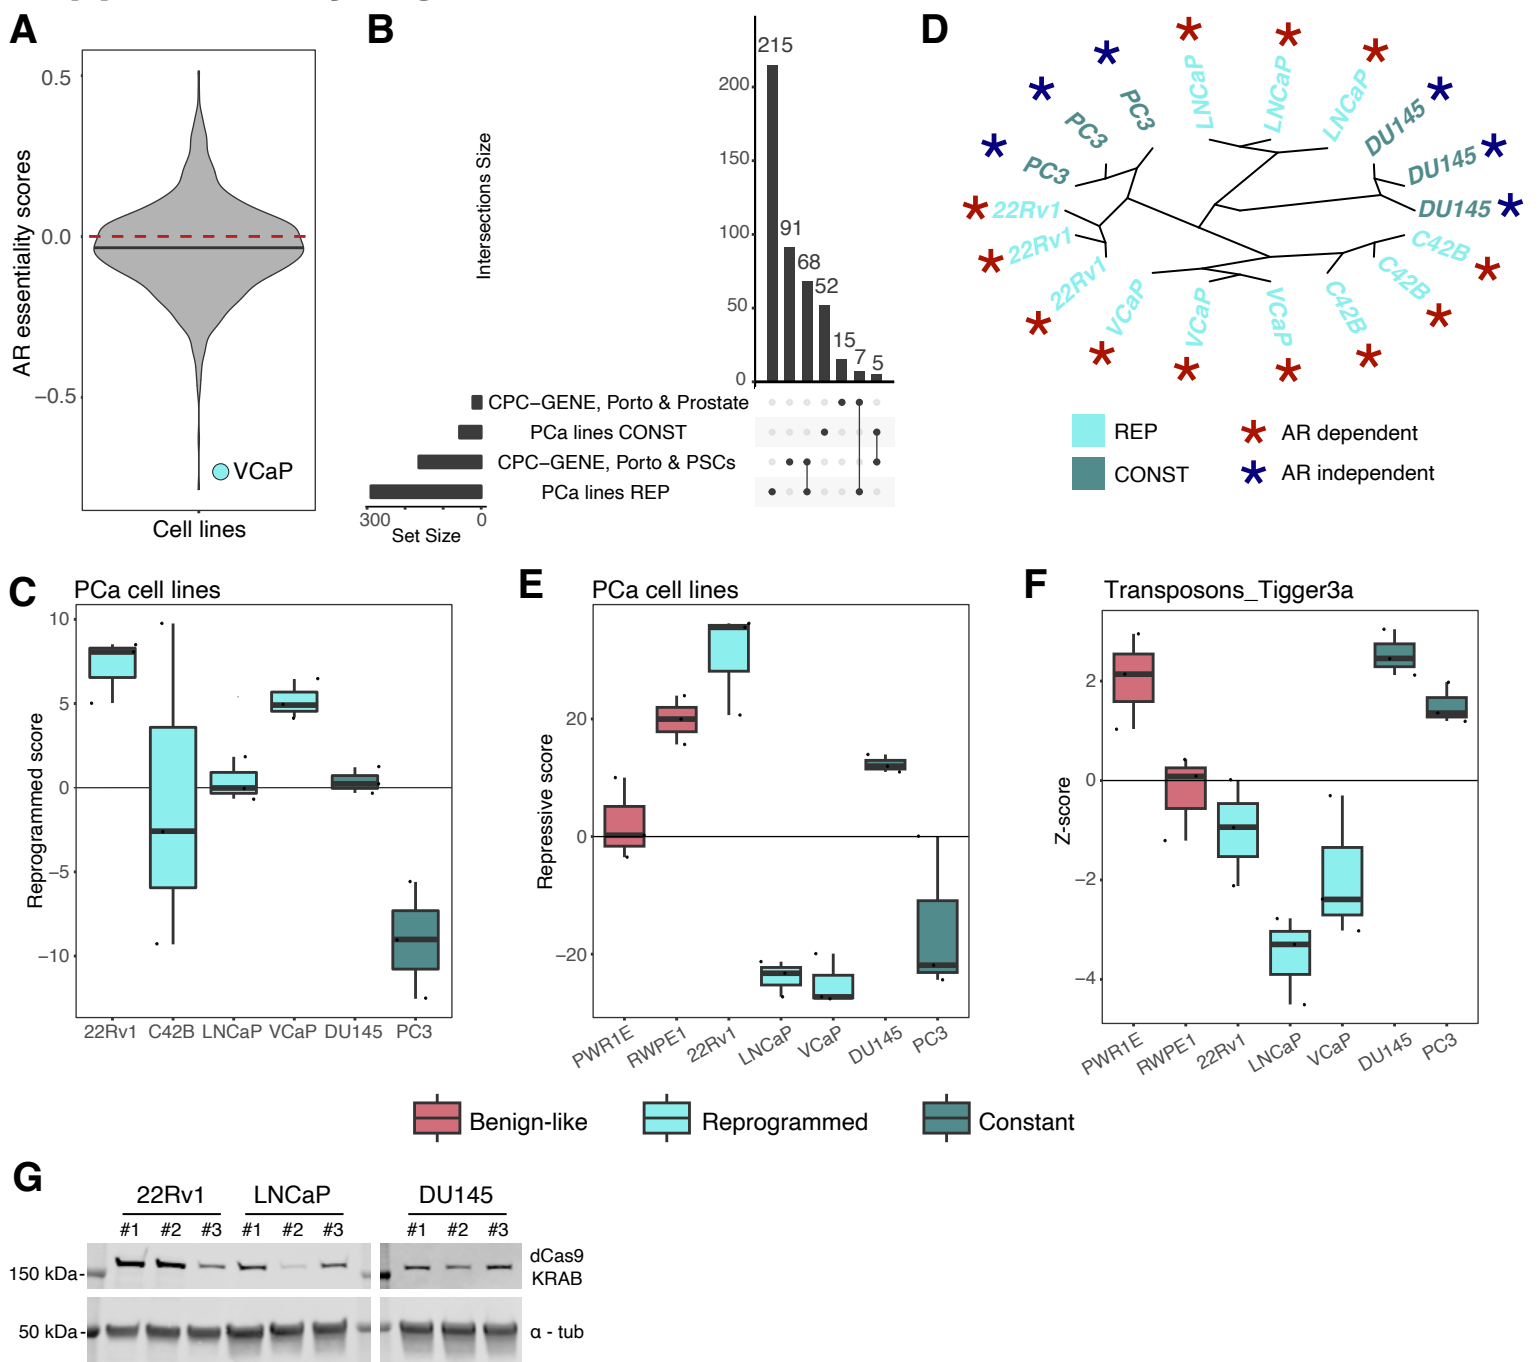

### Supplementary Figure S5

A. AR essentiality mediated through CRISPR/Cas9 across various cell lines. Each dot indicates a prostate cancer cell line. VCaP cell line was the only prostate cancer line included in Figure 5A included in the CRISPR/Cas9 screen, it is labeled with the name of the cell line and color-coded according to similarity to prostate cancer patients. The red dashed line corresponds to essentiality score = 0 threshold.

B. UpSet plot showing the intersection of transposable element families enriched in reprogrammed (REP) prostate cancer patients and in AR-dependent or independent prostate cancer cell lines. Note that 68 transposable element families are commonly enriched in AR-dependent prostate cancer cell lines and reprogrammed patients, leading us to name AR-dependent prostate cancer lines as reprogrammed prostate cancer lines.

C. Boxplot displaying the reprogramming score in prostate cancer cell lines.

D. Unsupervised hierarchical clustering (complete linkage) of prostate cancer cell lines based on presence/absence of H3K27ac regions. Note that the clustering does not match the one obtained using transposable elements enrichment.

E. Boxplot displaying the repressive score in prostate (cancer) cell lines.

F. Tigger3a enrichment across H3K9me3 profiles of prostate (cancer) cell lines. Boxplots show differential deviation Z-scores in prostate (cancer) cell lines.

G. dCas9-KRAB expression levels in clonal prostate cancer cell lines. Western blot was performed on whole extracts, showcasing variable dCas9-KRAB expression across prostate cancer cell lines and among different clones of the same cell line.  $\alpha$ -tubulin ( $\alpha$ -tub) was used as loading control.
