# Supplementary material for: Transposable Elements Are Co-opted as Oncogenic Regulatory Elements by Lineage-Specific Transcription Factors in Prostate Cancer
Source: PubMed Central journal article supplement — Cancer Discov. 2023 Sep 11;13(11):2470–87. doi: 10.1158/2159-8290.CD-23-0331 (PMC10618745; doi:10.1158/2159-8290.cd-23-0331), 2023-09-11
Supplement: cd-23-0331_supplementary_figure_s6_suppsf6.pdf [file cd-23-0331_supplementary_figure_s6_suppsf6.pdf]

# Supplementary Figure S6

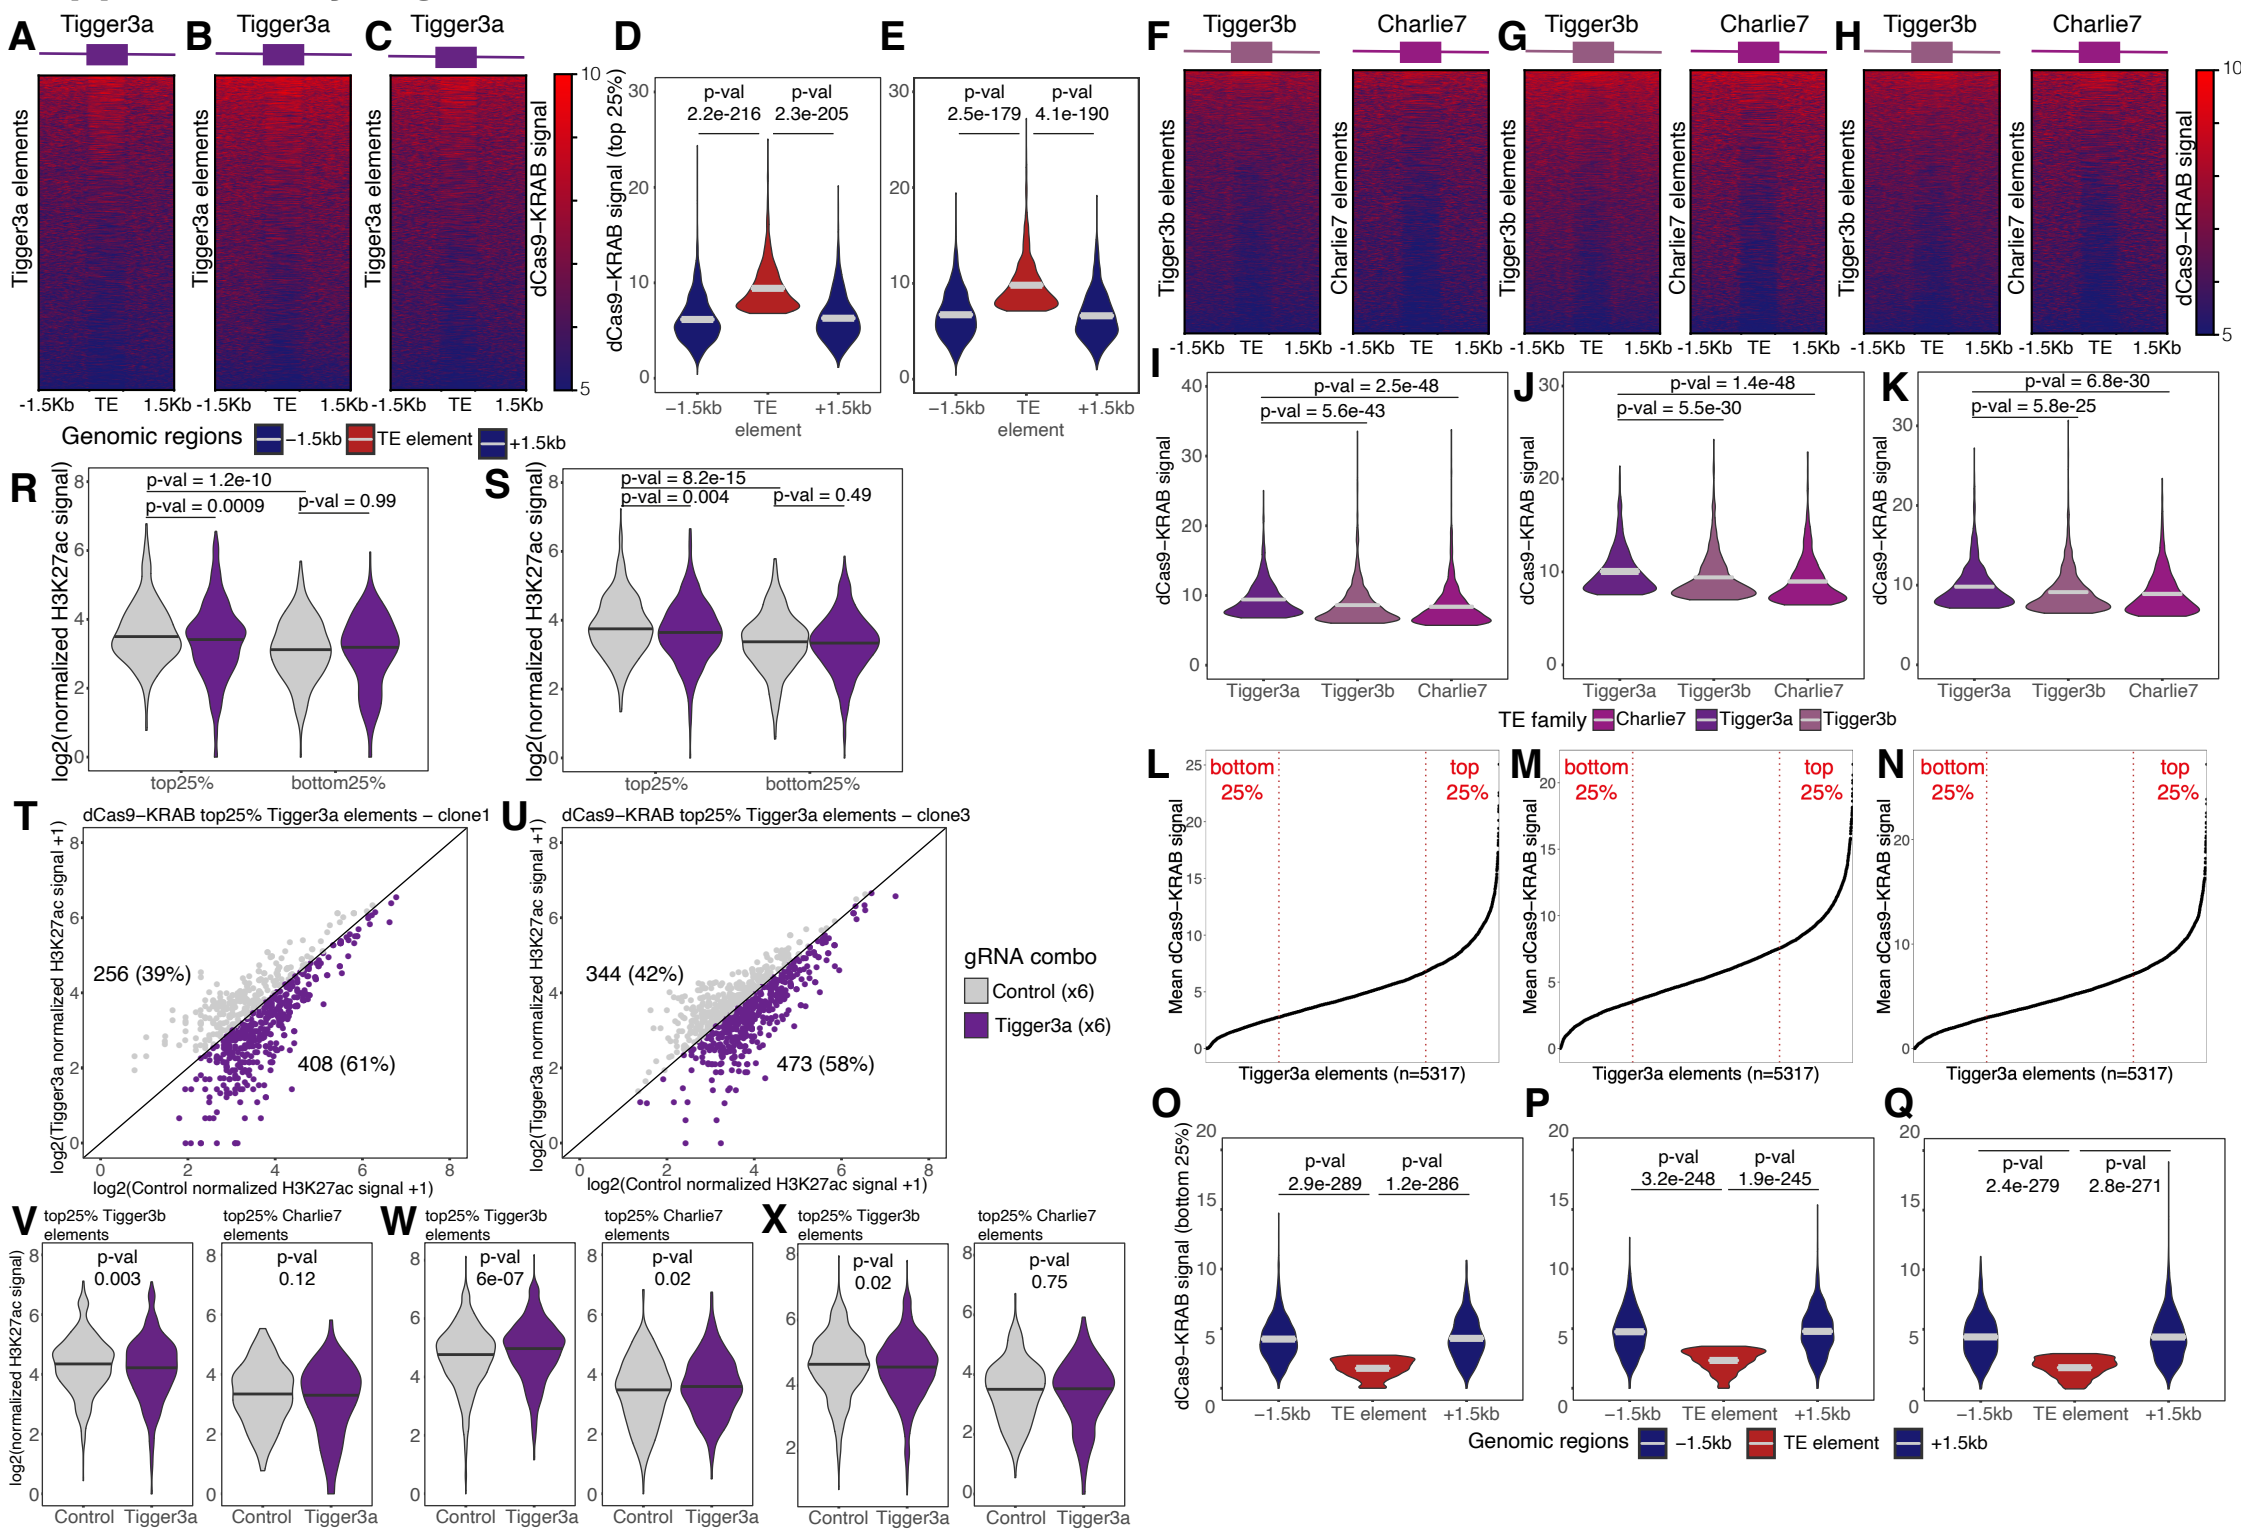

## Supplementary Figure S6

A., B. and C. Heatmaps representing dCas9-KRAB signal intensity over all Tigger3a elements present in the human genome in clone 1 (A), clone2 (B) and clone 3 (C) dCas9-KRAB 22Rv1 cells (each obtained from two independent nucleofections with Tigger3a gRNAs combination).

D. and E. Violin plots showcasing the dCas9-KRAB signal intensity over top 25% Tigger3a elements compared to matched flanking 1.5kb regions in clone 1 (D) and clone 3 (E) dCas9-KRAB dCas9-KRAB cells (upstream = -1.5kb, downstream = +1.5kb - right panel). p-value results of wilcoxon test are showcased on the violin plot.

F., G. and H. Heatmaps representing dCas9-KRAB signal intensity over all Tigger3b or Charlie7 elements present in the human genome in dCas9-KRAB 22Rv1 clone 1 (F), clone 2 (G) and clone 3 (H) (each obtained from two independent nucleofections with Tigger3a gRNAs combination).

I., J. and K. dCas9-KRAB signal difference among transposable element families. Violin plots showcasing the level of dCas9-KRAB signal over the top 25% elements for Tigger3a, Tigger3b and Charlie7 transposable element families. p-value results of wilcoxon test are showcased on the violin plot.

L., M. and N. Distribution of dCas9-KRAB signal over the entire set of Tigger3a elements. Every dot corresponds to one Tigger3a element. Red and dotted vertical lines identify the quartile of Tigger3a elements with high dCas9-KRAB signal (top 25%) and the quartile with low dCas9-KRAB signal (bottom 25%) in dCas9-KRAB 22Rv1 clone 1 (L), clone 2 (M) and clone 3 (N).

O., P. and Q. Violin plots showcasing the dCas9-KRAB signal intensity over bottom 25% Tigger3a elements compared to matched flanking 1.5kb regions (upstream = -1.5kb, downstream = +1.5kb) in dCas9-KRAB 22Rv1 clone 1 (O), clone 2 (P) and clone 3 (Q). p-value results of wilcoxon test are showcased on the violin plots.

R. and S. Violin plots showcasing the H3K27ac signal distribution in clone 1 (R) and clone 3 (S) dCas9-KRAB 22Rv1 cells nucleofected with Control (gray) or Tigger3a (purple) gRNAs combinations over Tigger3a elements with high dCas9-KRAB signal (top 25%) or low dCas9-KRAB signal (bottom 25%). p-value results of wilcoxon test are showcased on the violin plot.

T. and U. H3K27ac signal over top 25% dCas9-KRAB bound Tigger3a elements in clone 1 (T) and clone 3 (U) dCas9-KRAB 22Rv1 cells nucleofected with Control or Tigger3a gRNA combinations. Every dot corresponds to one Tigger3a element, x-axis represents the log<sub>2</sub> of the normalized H3K27ac signal intensity in two independent nucleofection with Control gRNAs combination, while the y-axis represents the log<sub>2</sub> normalized H3K27ac signal intensity in two independent nucleofection with Tigger3a gRNAs combination.

V., W. and X. Violin plot showcasing the H3K27ac signal distribution in clone 1 (V), clone 2 (W) and clone 3 (X) dCas9-KRAB 22Rv1 cells nucleofected with Control (gray) or Tigger3a (purple) gRNAs combinations over Tigger3b or Charlie7 elements with high dCas9-KRAB signal (top 25%). p-value results of wilcoxon test are showcased on the violin plot.
