# Supplementary material for: Transposable Elements Are Co-opted as Oncogenic Regulatory Elements by Lineage-Specific Transcription Factors in Prostate Cancer
Source: PubMed Central journal article supplement — Cancer Discov. 2023 Sep 11;13(11):2470–87. doi: 10.1158/2159-8290.CD-23-0331 (PMC10618745; doi:10.1158/2159-8290.cd-23-0331), 2023-09-11
Supplement: cd-23-0331_supplementary_figure_s7_suppsf7.pdf [file cd-23-0331_supplementary_figure_s7_suppsf7.pdf]

# Supplementary Figure S7

**A**

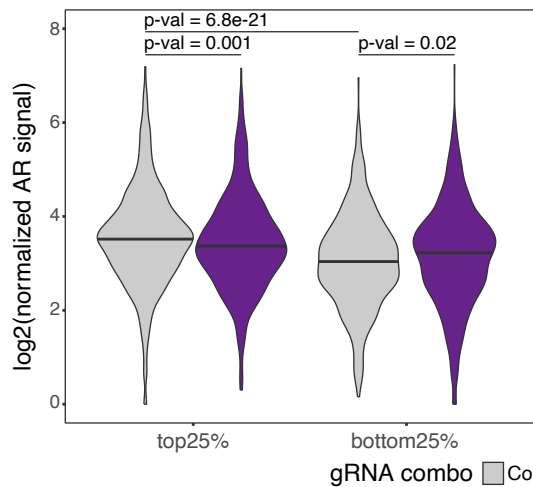

**B**

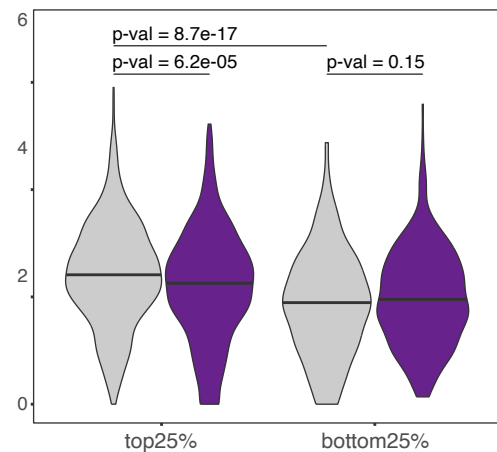

**D**

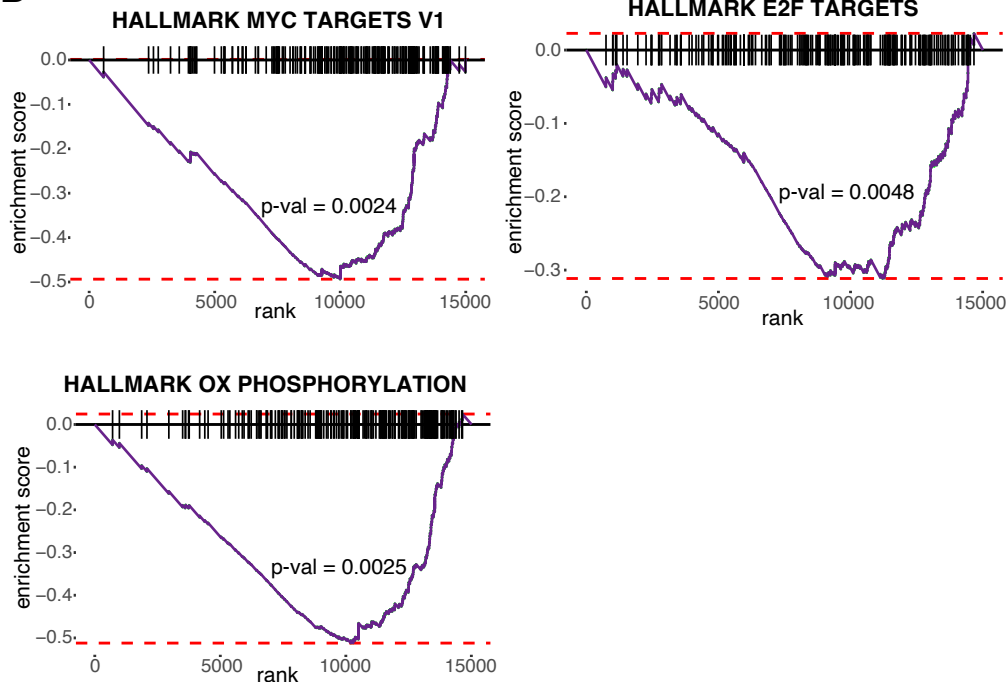

**C**

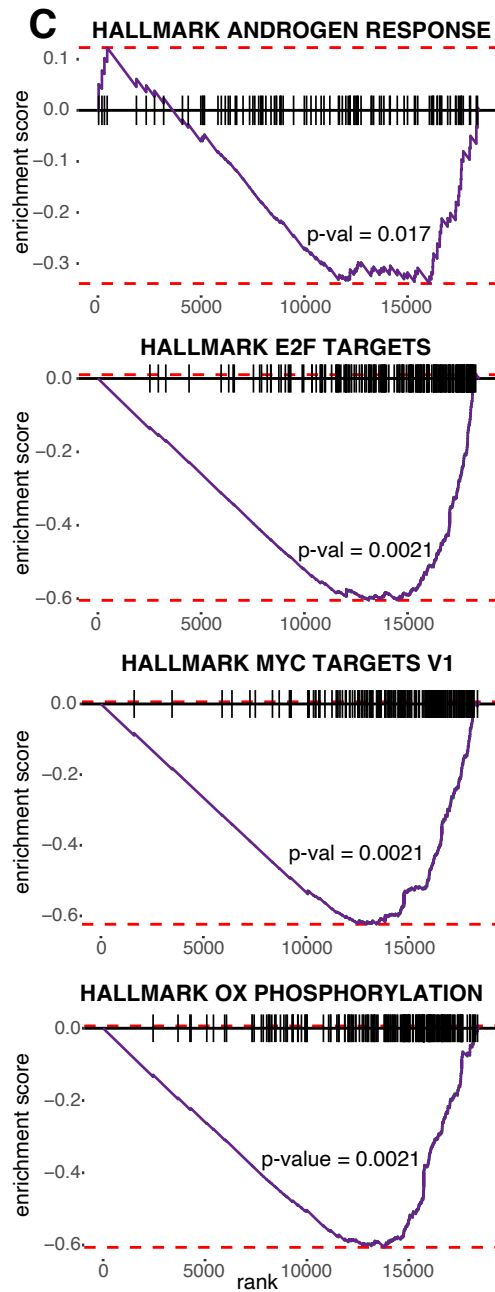

**E**

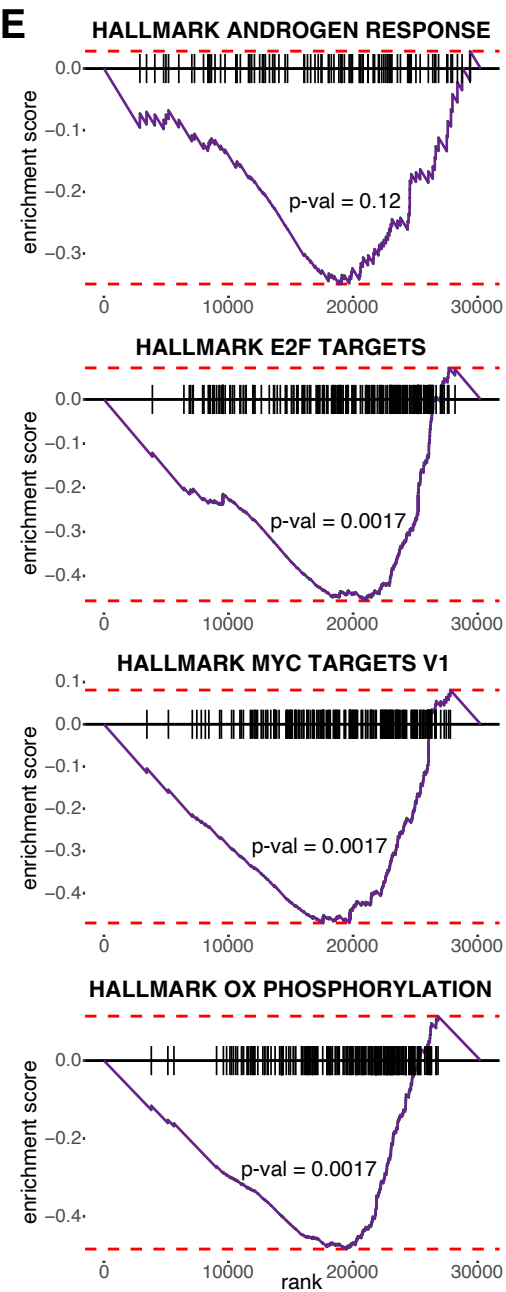

### **Supplementary Figure S7**

A. and B. Violin plots showcasing the AR signal distribution in clone 1 (A) and clone 3 (B) dCas9-KRAB 22Rv1 cells nucleofected with Control (gray) or Tigger3a (purple) gRNAs combinations over Tigger3a elements with high dCas9-KRAB signal (top 25%). p-value results of wilcoxon test are showcased on the violin plot.

C., D. and E. Gene set enrichment analysis (GSEA)-enrichment plots showcasing significant depletion of Androgen response, E2F target, MYC targets V1 and Oxidative (OX) phosphorylation genes in clone 1 (C), clone 2 (D) and clone 3 (E) dCas9-KRAB cells nucleofected with Tigger3a gRNA combination compared to control combination. For clone 2 Androgen response pathway is shown in Figure 5H. p-values results of weighted Kolmogorov–Smirnov test are showcased on the plots.
